# Supplementary material for: Determination of PaO2/FiO2 after 24 h of invasive mechanical ventilation and ΔPaO2/FiO2 at 24 h as predictors of survival in patients diagnosed with ARDS due to COVID-19
Source: PeerJ. 2022 Dec 13;10:e14290. doi: 10.7717/peerj.14290 (PMC9756861; doi:10.7717/peerj.14290)
Supplement: Supplemental Information 2 [file peerj-10-14290-s003.xlsx]

## Sheet: Hoja1
Cod	Code assigned to each medical record
Edad_Años	Numerical variable: age in years
Sexo_Hombre1_Mujer0	Gender categorical variable: (1) man - (0) woman
Obesidad_No0_Si1	Obesity categorical variable: (1) present - (0) absent
HTA_No0_Si1	Arterial hypertension categorical variable: (1) present - (0) absent
CV_No0_Si1	Heart failure categorical variable: (1) present - (0) absent
DM2_No0_Si1	Category variable diabetes mellitus: (1) present - (0) absent
Respiratorio_No0_Si1	Asthma categorical variable: (1) present - (0) absent
ERC_No0_Si1	Chronic kidney disease categorical variable: (1) present - (0) absent
Inmunos_No0_Si1	Immunosuppression categorical variable: (1) present - (0) absent
Número_Comorbi	Numerical variable - number of comorbidities
Fallecio_No0_Si1	Categorical variable - final result: (1) death - (0) survival
TiempoDeHospitalización	Numerical variable - days of hospitalization
DiasUCI	Numerical variable - days hospitalized in the ICU
DíasVM	Numerical variable - days on mechanical ventilation
TToATB_CuandoIngreso_UCI_No0_Si1	Categorical variable - received antibiotic treatment: (1) present - (0) absent
TToVasopresor_No0_Si1	Categorical variable - received vasopressor treatment: (1) present - (0) absent
TToCorticoides_No0_Si1	Categorical variable - received corticosteroid treatment: (1) present - (0) absent
Colchicina_No0_Si1	Categorical variable - received colchicine treatment: (1) present - (0) absent
Tocilizumab_No0_Si1	Categorical variable - receives treatment with tocilizumab: (1) present - (0) absent
TTopReemplazoRenal_No0_Si1	Categorical variable - receives emergency renal replacement therapy: (1) present - (0) absent
Infección_Real_No0_Si1	Categorical variable - Had bacterial superinfection as a complication: (1) present - (0) absent
NV_Real	Categorical variable - had ventilator-associated pneumonia as a complication: (1) present - (0) absent
Bacteriemia_Real	Categorical variable - had bloodstream infection as a complication: (1) present - (0) absent
ITU_Real	Categorical variable - had urinary tract infection as a complication: (1) present - (0) absent
Sepsis_No0_Si1	Categorical variable - had sepsis as a complication: (1) present - (0) absent
ShockSeptico_No0_Si1	Categorical variable - had septic shock as a complication: (1) present - (0) absent
Insuf_RenalAg_No0_Si1	Categorical variable - had acute kidney injury as a complication: (1) present - (0) absent
Arritmias_No0_Si1	Categorical variable - had cardiac arrhythmia as a complication: (1) present - (0) absent
DañoPulmonarenTAC	Numerical variable - percentage of lung damage
FiO2MasAlto	Numerical variable - Fio2 administered upon admission to mechanical ventilation
PeepMasAlto	Numerical variable - positive end-expiratory pressure administered upon admission to mechanical ventilation
PresiónPico	Numerical variable - peak pressure administered upon admission to mechanical ventilation
PresiónInspiratoria	Numerical variable - inspiratory pressure administered upon admission to mechanical ventilation
ProCalcitonina	Numerical variable - procalcitonin value
PCR	Numerical variable - c-reactive protein value
Leucocitos	Numerical variable - leukocyte value
Linfocitos	Numerical variable - percentage value of lymphocytes
Plaquetas	Numerical variable - value of number of platelets
TGO	Numerical variable - Aspartate aminotransferase value
TGP	Numerical variable - Alanine aminotransf value
Bilirrubina	Numerical variable - bilirubin value
Creatinina	Numerical variable - creatinine value
CPKTotal	Numerical variable - Creatinine phosphokinase value
CPKMB	Numerical variable - Creatinine phosphokinase-MB value
LDH	Numerical variable - Lactate dehydrogenase value
SatO2	Numerical variable - Oxygen saturation
PaFio2	Numerical variable - Value of PaO2/FiO2 at emergency admission
Edad_cat	Categorical variable - Age in categories (1) <50 years, (2) 50-59 years, (3) ≥60 years.
Comor_Cat	Categorical variable - number of comorbidities in categories (1) none, (2) 1 comorbidity, (3) from 2 to more
PaFio2_MasBajo_AntesDe_VMI	Numerical variable - PaO2/FiO2 value upon entering mechanical ventilation
PaFio2_MasAlto_Luego_24Hrs	Numerical variable - PaO2/FiO2 value after 24 hours in mechanical ventilation
Variacion_PaFiO2	Numerical variable - Delta (variation) of PaO2/FiO2 after 24 hours in mechanical ventilation
sofa	Numerical variable - sofa score
Ards_cat	Categorical variable - severity of ARDS after 24 hours on mechanical ventilation in categories, (1) mild, (2) moderate, (3) severe.
drivingpresure	Numerical variable - driving pressure value
linfocitos	Numerical variable - absolute number of lymphocytes
volumentidal	Numerical variable - Tidal volume in mechanical ventilation
Ards_cat2	Categorical variable - severity of ARDS upon admission to mechanical ventilation in categories, (1) moderate, (2) severe
PaFio2_cat	Categorical variable - PaO2/FiO2 after 24 hours, (1) High (>=222.5), (2) Low (<222.5).
Delta_cat	Categorical variable - Delta PaO2/FiO2, (1) High (>=109.5), (2) Low (<109.5).
Peep_cat	Categorical variable - Peep when entering MV, (1) low (<=12), (2) high (>12).
Meseta_cat	Categorical variable - Plateau pressure upon admission to MV, (1) low (<30), (2) high (>=30).
driving_cat	Categorical variable - Driving pressure upon entering MV, (1) low (<15), (2) high (>=15).
DañoPulmon_cat	Categorical variable - Percentage of lung damage, (1) low (0 to 30), (2) moderate (30 to 50), (3) high (more than 50).
sobrevida	Categorical variable - Survival (1) yes, (2) no.
cutoff_PafiO2	Categorical variable - PaO2/FiO2 after 24 hours, (1) High (>=222.5), (0) Low (<222.5).
cutoff_Delta	Categorical variable - Delta PaO2/FiO2, (1) High (>=109.5), (0) Low (<109.5).
