# Supplementary material for: Determination of PaO2/FiO2 after 24 h of invasive mechanical ventilation and ΔPaO2/FiO2 at 24 h as predictors of survival in patients diagnosed with ARDS due to COVID-19
Source: PeerJ. 2022 Dec 13;10:e14290. doi: 10.7717/peerj.14290 (PMC9756861; doi:10.7717/peerj.14290)
Supplement: Supplemental Information 3 [file peerj-10-14290-s004.xls]

## Sheet: Sheet1
Cod	Edad_Años	Sexo_Hombre1_Mujer0	Obesidad_No0_Si1	HTA_No0_Si1	CV_No0_Si1	DM2_No0_Si1	Respiratorio_No0_Si1	ERC_No0_Si1	Inmunos_No0_Si1	Número_Comorbi	Fallecio_No0_Si1	TiempoDeHospitalización	DiasUCI	DíasVM	TToATB_CuandoIngreso_UCI_No0_Si1	TToVasopresor_No0_Si1	TToCorticoides_No0_Si1	Colchicina_No0_Si1	Tocilizumab_No0_Si1	TTopReemplazoRenal_No0_Si1	Infección_Real_No0_Si1	NV_Real	Bacteriemia_Real	ITU_Real	Sepsis_No0_Si1	ShockSeptico_No0_Si1	Insuf_RenalAg_No0_Si1	Arritmias_No0_Si1	DañoPulmonarenTAC	FiO2MasAlto	PeepMasAlto	PresiónPico	PresiónInspiratoria	ProCalcitonina	PCR	Leucocitos	Linfocitos	Plaquetas	TGO	TGP	Bilirrubina	Creatinina	CPKTotal	CPKMB	LDH	SatO2	PaFio2	Edad_cat	Comor_Cat
87	41	0	1	0	0	0	1	0	0	2	0	19	5	3	1	0	1	0	0	0	0	0	0	0	0	0	0	0	40	40	10	28	14	0.05	14.9	10840	5.9	307000	23	37	0.3	0.62	60	23.5	780	91	272	1	3
128	40	1	0	0	0	0	1	0	0	1	0	43	33	33	1	0	1	0	0	0	0	0	0	0	1	1	0	0	50	100	13	28	18		17	8000	6	186000	113	161	1	0.79	462	63	1560	88	54	1	2
163	47	1	1	1	0	0	0	0	0	2	0	25	15	14	1	0	1	1	0	0	0	0	0	0	0	0	0	0	65	60	12	29	17	0.17	13	6670	6	169000	38	62	0.72	0.81	50	44	802	89	127	1	3
194	39	1	0	0	0	0	0	0	0	0	0	27	13	13	1	0	1	0	0	0	0	0	0	0	1	0	0	0	50	90	12	35	18		15.74	10680	3	313000	59	86		0.94	547	90.4	1303	88	259	1	1
121	42	1	0	0	0	0	1	0	0	1	0	11	2	2	1	0	1	0	0	0	0	0	0	0	0	0	0	0	50	100	8	20	12		15	10000	11	463000	102	206	0.24	0.8	35	22	484	87	308	1	2
110	55	1	0	0	0	0	0	0	0	0	0	27	18	17	1	0	1	1	0	0	1	1	0	0	1	1	0	0	70	45	12	26	14		17.95	12150	6.4	243000	50	40	0.25	0.86	112	28.6	655	91	306	2	1
7	52	0	1	0	0	1	0	0	0	2	1	34	32	32	1	1	1	0	0	0	1	1	0	0	1	1	0	0	65	70	12	31	15	0.02	16.9	6950	11	367000	25	56	0.6	0.41	89	15	476	89	400	2	3
197	62	1	0	0	0	0	0	0	0	0	0	14	3	3	0	0	1	0	0	0	0	0	0	0	0	0	0	0	40	60	14	25	14		16.76	7290	5	405000	9	21		1.04	130	23	397	91	304	3	1
46	78	1	0	1	1	0	0	0	0	2	1	38	18	25	1	1	1	0	0	0	0	0	0	0	1	0	0	0	70	60	15	30	15	0.17	13.1	8630	9	271000	102	361	0.12	1.07	300	19	549	80	203	3	3
114	39	0	1	0	0	0	0	0	0	1	0	15	2	3	1	0	1	0	0	0	0	0	0	0	0	0	0	0	50	60	10	25	15		22	11000	9	423000	28	48	0.6	1.15	60	37	611	89	310	1	2
176	34	0	1	0	0	0	0	0	0	1	0	33	26	19	1	1	1	1	0	0	0	0	0	0	0	0	0	0	60	30	12	30	18	0.4	17.9	7250	6	329000	60	87	0.7	0.72			1067	93	294	1	2
185	35	1	0	0	0	0	0	0	0	0	0	15	2	6	1	0	1	0	0	0	0	0	0	0	1	0	0	0	40	60	11	26	18		5.53	6820	18	486000	111	298	0.5	0.61	105	15.6	590	90	176	1	1
74	61	0	0	1	0	1	0	0	0	2	0	29	4	3	1	1	1	0	0	0	0	0	0	0	0	0	0	0	70	40	10	24	12	0.05	1.36	12620	9	170000	14	28	0.88	0.68	30	21	723	90	289	3	3
118	48	1	1	1	0	0	0	0	0	2	0	17	5	5	1	0	1	0	0	0	0	0	0	0	0	0	0	0	50	90	12	28	16		11	13000	10	498000	74	164	1	0.85	110	21	1201	93	320	1	3
181	40	1	0	0	0	0	0	0	0	0	0	10	4	3	1	0	1	1	0	0	0	0	0	0	1	0	0	0	50	28	11	28	16	0.143	16.94	7440	6	266000	58	74	0.8	0.79	484	30.1	724	91	314	1	1
180	26	1	1	0	0	0	0	0	0	1	0	14	7	7	1	0	1	0	0	0	0	0	0	0	1	0	0	0	50	75	18	26	18	0.08	1.62	6440	5	202000	50	49	0.9	0.74	260	19.2	1760	93	284	1	2
108	64	1	0	0	0	0	0	0	0	0	0	33	28	28	1	0	1	0	0	0	0	0	0	0	1	1	0	1	50	50	12	27	15	0.02	21.74	7710	12.9	141000	99	163	0.56	0.87	287	23.1	513	94	351	3	1
94	70	0	1	0	0	1	0	0	0	2	0	30	16	18	1	0	1	0	0	0	0	0	0	0	1	0	0	0	80	80	8	25	15	0.06	2.98	10830	6	317000	29	21	0.67	0.68	116	24.6	581	82	269	3	3
115	36	1	1	0	0	0	0	0	0	1	0	18	1	2	1	0	1	0	0	0	0	0	0	0	0	0	0		50	100	10	25	15		13	16000	8	739000	763	148	0.5	1	726	30	477	86	348	1	2
43	49	1	0	0	0	1	0	0	0	1	0	15	8	8	1	0	1	1	0	0	0	0	0	0	1	0	0	0	65	50	14	33	13	0.02	1.92	7930	6	272000	20	50	1.13	1.22	161	14.7	450	86	228	1	2
174	29	0	1	0	0	0	0	0	0	1	0	12	2	4	1	0	1	0	0	0	0	0	0	0	0	0	0	0	50	35	9	24	18		12.75	8940	22	268000	32	26	1.65	0.66	139	9.1	661	90	286	1	2
173	32	1	1	0	0	0	1	0	0	2	0	11	2	3	1	0	1	0	0	0	0	0	0	0	1	0	0	0	60	55	12	24	11		11.05	10160	14	399000	40	81	0.8	0.73	204		635	89	131	1	3
172	49	1	1	1	0	1	1	0	0	4	0	39	35	32	1	0	1	0	0	0	0	0	0	0	0	0	0	0	50	30	12	26	14	0.05	16.72	7540	12	347000	50	70	0.6	0.38			500	80	97	1	3
96	55	1	1	0	0	0	0	0	0	1	0	13	6	7	1	1	1	0	0	0	0	0	0	0	1	0	0	0	60	60	10	28	17	0.08	14	7800	8	215000	78	56	0.49	0.68	212	56	800	86	297	2	2
170	40	1	1	1	0	0	0	0	0	2	0	16	11	10	1	0	1	0	0	0	0	0	0	0	1	0	0	0	50	50	14	28	14	1.38	17.58	17340	8	232000	111	76	0.7	0.88	703	28.9	763	90	183	1	3
156	44	0	1	1	0	0	0	0	0	2	0	27	6	6	1	0	1	1	0	0	0	0	0	0	1	0	0	0	50	50	12	33	20			7160	9	378000	177	82	0.46	0.51	68	39.5	1490	89	97	1	3
138	49	0	1	1	0	1	0	0	0	3	0	14	6	8	1	0	1	0	0	0	1	0	1	0	1	0	0	0	50	80	12	28	16		26	4000	17	284000	28	22	0.6	0.47	251	18	702	87	254	1	3
146	58	1	1	1	0	1	0	0	0	3	0	12	7	6	1	0	1	0	0	0	0	0	0	0	0	0	0	0	50	44	14	29	15		11	13000	6.9	173000	45	35	0.45	1.5	373	27	918	90	307	2	3
164	35	1	1	0	0	0	0	0	0	1	0	21	12	11	1	0	1	0	0	0	0	0	0	0	1	0	0	0	70	70	15	26	20	0.13	12.34	10650	11.4	181000	56	84	0.5	0.89		34.7	1250	93	148	1	2
34	35	1	1	0	0	0	1	0	0	2	0	9	6	5	1	1	1	1	0	0	0	0	0	0	1	0	0	0	60	80	15	31	9	0.1	3.83	9240	20	277000	68	30	0.3	0.82	100	17.9	803	85	222	1	3
58	47	1	1	0	0	1	0	0	0	2	1	25	11	11	1	1	1	1	0	0	0	0	0	0	0	0	1	0	65	100	15	30	12	2.21	14.41	9990	5	243000	101	78	0.68	1.87	203	68	747	90	241	1	3
137	35	1	0	0	0	0	0	0	0	0	0	10	2	3	1	0	1	0	0	0	0	0	0	0	0	0	0	0	40	80	10	30	20		9	10000	6	347000	175	209	0.5	0.7	87	31	466	89	297	1	1
153	59	1	0	0	0	0	0	0	0	0	1	49	21	23	1	0	1	0	0	0	1	1	0	0	1	0	0	0	80	55	10	25	18			8190	11	261000	30	29	0.68	0.53	61	13.4	469	80	223	2	1
54	72	1	0	0	0	1	0	0	0	1	1	14	12	12	1	1	1	1	1	0	0	0	0	0	1	0	0	0	75	30	13	29	16	0.06	2.38	11250	5	272000	20	27	0.96	0.72	291	40	642	80	185	3	2
192	64	0	1	0	0	0	0	0	0	0	0	14	7	5	1	0	1	0	0	0	0	0	0	0	0	0	0	0	50	65	10	23	13			14000	5	210000	30	40		0.98			580	85	270	3	1
32	46	1	1	0	0	1	0	0	0	2	0	16	11	13	1	0	1	1	0	0	0	0	0	0	0	0	0	0	50	80	13	29	13	0.1	10.05	6090	7	328000	33	52	0.83	0.89	64	20	841	85	215	1	3
28	52	1	0	0	0	1	0	0	1	2	0	21	9	9	1	0	1	0	1	0	0	0	0	0	0	0	0	0	50	45	13	29	16	0.06	2.34	3310	22	245000	71	119	1.02	1.06	73	35	458	89	264	2	3
155	52	1	0	0	0	0	0	0	0	0	0	17	2	3	1	0	1	0	0	0	0	0	0	0	0	0	0	0	60	35	12	26	27			6850	9.8	311000	65	169	0.6	0.83	335	20.7	727	95	350	2	1
126	33	1	1	0	0	0	0	0	0	1	0	9	3	3	1	0	1	0	0	0	0	0	0	0	0	0	0	0	35	100	10	26	16		18	7000	15	325000	16	32	1	1.07	231	20	424	92	307	1	2
142	55	1	1	0	0	1	0	0	0	2	0	13	2	3	1	0	1	0	0	0	0	0	0	0	0	0	0	0	40	60	14	29	15		15	12000	11	406000	74	149	1.21	0.6	122	26	564	88	273	2	3
186	47	1	0	0	0	0	0	0	0	0	1	21	19	19	1	0	1	0	0	0	0	0	0	0	1	0	0	0	50	30	14	32	16	0.23	22.68	7750	11	101000	49	47	0.54	1.05			851	94	181	1	1
13	57	1	1	0	0	0	0	0	0	1	0	19	10	10	1	1	1	0	1	0	0	0	0	0	1	0	0	0	40	40	14	30	15	0.04	19	10290	9	290000	79	133	0.9	0.58	414	31.5	617	89	256	2	2
132	57	1	0	0	0	0	0	0	0	0	0	17	5	4	1	0	1	0	0	0	0	0	0	0	0	0	0	0	50	100	12	27	15	0.7	11	6000	3	335000	185	490	2.09	0.7	184	19	1014	87	252	2	1
89	33	1	1	0	0	1	0	0	0	2	0	26	17	16	1	0	1	0	0	0	0	0	0	0	0	0	0	0	50	40	12	28	18	0.55	19.2	23320	4	257000	41	70	0.45	0.96	105	16.2	814	84	173	1	3
184	54	1	1	0	0	0	0	0	0	1	0	32	23	24	1	0	1	0	0	0	1	0	0	1	1	0	1	0	70	60	15	28	20	0.645	18.65	17480	3	290000	31	39	0.74	0.87	260	27.2	749	86	257	2	2
17	75	1	0	1	0	0	0	0	0	1	1	35	27	25	1	0	1	0	0	0	0	0	0	0	0	0	0	0	60	90	12	30	15	0.19	17.52	16580	4	535000	39	134	1.13	0.88	79	16	458	87	243	3	2
92	41	1	1	0	0	0	0	0	0	1	0	18	3	5	1	1	1	0	0	0	0	0	0	0	1	0	0	0	70	30	12	20	12	0.12	3.12	7830	23	416000	111	199	0.53	1.06	155	50.9	872	90	410	1	2
73	69	1	1	0	0	0	0	0	0	1	1	18	12	13	1	1	1	1	0	1	1	1	0	0	1	1	1	0	85	70	12	30	17	0.04	12.53	16590	10	461000	98	106	0.63	0.84	41	19.2	845	90	260	3	2
177	66	0	0	0	0	0	0	0	1	2	0	15	5	4	1	0	1	0	0	0	0	0	0	0	1	0	0	0	50	35	10	28	18	0.05	3.39	6980	20	372000	54	79	0.8	0.7			651	95	335	3	3
169	61	1	1	1	0	1	0	0	0	3	0	34	19	18	1	1	1	1	0	0	0	0	0	0	1	1	1	0	50	100	14	30	20	0.37	13.2	7590	7.2	161000	32	34	0.51	1.58		26.1	1114	94	228	3	3
148	55	1	0	1	0	0	0	0	0	1	0	13	4	3	1	0	1	0	0	0	0	0	0	0	0	0	0	0	40	100	12	24	12		25	7000	9	318000	43	61	0.47	0.9	290	34	669	88	302	2	2
147	39	0	1	0	0	0	1	0	0	2	0	12	8	6	1	0	1	0	0	0	0	0	0	0	1	0	0	0	40	70	10	30	20		23	7700	14	254000	28	36	0.2	0.61	95	38	687	85	254	1	3
24	63	1	0	0	0	1	1	0	0	2	0	16	8	6	1	1	1	0	1	0	0	0	0	0	1	0	0	0	60	40	12	17	6	0.05	4.36	8210	42	364000	121	151	0.69	0.88	559	70	717	90	309	3	3
125	54	1	0	0	0	0	0	0	0	0	0	20	8	7	1	0	1	1	0	0	0	0	0	0	1	0	0	0	60	100	12	34	22		7	14000	15	562000	52	172	0.49	0.96	100	29	626	88	266	2	1
4	63	0	1	0	0	0	0	0	0	1	0	23	18	13	1	0	1	0	0	0	0	0	0	0	1	0	0	0	60	20	10	27	13	0.07	16.84	4250	27.5	195000	47	52	1	0.58	86	51	633	85	730	3	2
123	48	1	0	0	0	0	0	0	0	0	0	8	3	3	1	0	1	0	0	0	0	0	0	0	0	0	0	0	50	100	10	25	15		5	21000	4	706000	35	171	0.6	0.88	364	32	551	89	286	1	1
122	40	1	1	0	0	0	0	0	0	1	0	15	4	4	1	0	1	1	0	0	0	0	0	0	0	0	0	0	70	100	10	24	14		2	4000	12	178000	45	46	1	0.8	206	22	993	90	253	1	2
130	49	1	0	0	0	0	1	0	0	1	0	11	3	4	1	0	1	0	0	0	0	0	0	0	0	0	0	0	60	100	11	27	16	0.14	12	6000	9	324000	36	46	0.56	0.6	658	74	565	87	280	1	2
120	51	1	1	0	0	0	0	0	0	1	0	19	5	4	1	0	1	0	0	0	0	0	0	0	0	0	0	0	50	80	14	28	14		3	8000	16	366000	134	313	1	0.8	300	46	585	96	307	2	2
100	55	1	1	1	0	1	0	0	0	3	0	18	12	13	1	1	1	0	0	0	0	0	0	0	1	0	0	0	60	80	10	30	20	0.15	6.09	10450	5	279000	35	23	1.72	0.81	269	49.1	1020	84	234	2	3
57	86	1	1	0	0	0	0	0		1	0	23	8	12	1	0	0	0	1	0	1	1	0	0	0	0	0	0	60	90	10	28	15	0.99	6.82	10510	5.5	324000	25	47	0.3	0.73	36	8	552	90	136	3	2
75	82	0	0	0	0	0	0	0	1	1	0	47	36	35	1	1	1	0	0	0	0	0	0	0	1	0	0	0	70	50	12	28	14	0.37	5.35	5640	6	177000	41	119	0.8	0.75	26	22	487	86	236	3	2
11	49	1	1	0	0	0	1	0	0	2	0	68	66	64	1	1	1	0	0	1	1	1	0	0	1	1	1	0	75	80	10	38	15	12.03	18.54	17410	10	468000	55	66	0.65	1.25	77	16	991	80	203	1	3
154	50	1	0	0	0	0	0	0	0	0	0	13	6	6	1	1	1	1	0	0	0	0	0	0	1	0	0	0	50	23	9	26	14			6640	5.3	320000	65	93	0.32	0.8			780	90	179	2	1
140	47	0	1	0	0	1	1	0	0	3	1	14	10	11	1	1	1	0	0	0	1	1	0	0	0	1	0	0	50	100	10	32	22			10000	6	219000	47	35	1	0.6	70	32	970	88	232	1	3
198	50	1	0	0	0	0	0	0	0	0	0	23	13	12	1	0	1	0	0	0	0	0	0	0	1	0	0	0	70	45	12	30	16		6	13450	7	203000	37	38		0.82			685	85	234	2	1
167	41	1	1	0	0	0	0	0	0	1	0	20	7	8	1	0	0	1	0	0	0	0	0	0	1	0	0	0	70	60	14	28	18	0.334	2.3	8850	5	142000	84	50	0.5	0.93	1695	51.8	1152	84	102	1	2
106	67	1	1	1	0	0	0	0	0	2	0	39	34	28	1	0	1	0	0	0	0	0	0	0	1	1	0	1	70	35	10	25	14	0.11	13.58	156900	5	331000	79	155	0.3	0.9	119	20.7	581	70	113	3	3
18	68	1	1	0	0	1	0	0	0	2	0	21	10	8	1	1	1	0	0	0	0	0	0	0	0	0	0	0	50	35	12	27	11	0.04	15.65	5540	9.9	663000	75	177	0.35	0.75	150	21	618	31	300	3	3
104	37	1	0	0	0	0	0	0	0	0	0	12	3	3	1	1	1	0	0	0	0	0	0	0	1	1	0	0	40	60	15	31	15	0.16	5.6	5420	7	282000	19	20	0.2	0.98	87	30	960	87	312	1	1
103	62	0	1	1	0	0	0	0	0	2	0	23	7	8	1	0	1	0	0	0	0	0	0	0	1	0	0	0	60	75	15	31	15	0.16	2	3090	15	219000	70	45	1.02	0.53	171	35	633	86	187	3	3
102	62	1	1	1	0	1	0	0	0	3	0	12	5	7	1	0	0	0	0	0	0	0	0	0	1	0	0	0	70	60	10	25	15	0.06	6.24	10080	11.2	252000	18	22	0.33	0.96	218	20	558	79	138	3	3
63	69	1	1	1	0	0	0	0	0	2	0	20	11	10	1	1	1	1	1	0	0	0	0	0	0	0	1	0	75	45	12	33	16	0.09	16.24	12135	6	381000	16	25	0.7	1.4	50	30	1024	80	219	3	3
159	32	0	1	0	0	0	0	0	0	1	0	7	2	1	1	0	1	0	0	0	0	0	0	0	1	0	0	0	30	45	12	28	20		6.39	3420	54.1	180000	40	60	0.36	0.66		26.4	569	94	362	1	2
101	51	1	1	0	0	0	0	0	0	1	0	15	4	7	1	0	1	0	0	0	0	0	0	0	1	0	0	0	45	40	10	25	15	0.25	17.4	22490	9	198000	58	59	1.04	0.78	101	34	819	87	251	2	2
131	28	0	1	0	0	0	0	0	0	1	0	10	3	6	1	0	1	0	0	0	0	0	0	0	0	0	0	0	50	70	10	24	14		1	10000	12	525000	74	113	0.3	0.6	100	25	833	88	283	1	2
111	50	1	0	0	0	0	0	0	0	0	0	23	13	12	1	0	1	0	0	0	1	1	0	0	1	1	0	0	80	45	12	30	16		18.5	16810	5	223000	68	123	0.2	0.75	57	20.3	969	80	234	2	1
152	64	1	0	0	0	0	0	0	0	0	0	15	4	5	1	0	1	0	0	0	0	0	0	0	1	0	0	0	50	90	12	28	30		14.53	12300	5	167000	21	38	0.59	0.72	658	22.2	1065	92	245	3	1
95	51	1	0	0	0	0	0	0	0	0	0	13	3	3	1	1	1	0	0	0	0	0	0	0	0	0	0	0	60	60	12	26	15	0.18	18.52	13700	6	234000	18	25	0.53	0.78	139	30.2	566	88	198	2	1
143	49	1	1	0	0	0	0	0	0	1	0	13	5	6	1	0	1	0	0	0	0	0	0	0	0	0	0	0	40	70	8	26	18		0.9	7000	7	245000	151	112	0.9	0.7	99	20	775	84	243	1	2
91	48	1	1	0	0	0	0	0	0	1	0	21	10	9	1	0	1	0	0	0	1	0	1	0	1	0	0	0	60	60	12	21	12	0.16	10.56	9070	6	395000	61	117	0.8	0.7	120	27	843	88	171	1	2
149	55	0	1	0	0	0	0	0	0	1	1	12	5	5	1	1	1	0	0	0	0	0	0	0	0	0	0	1	50	80	12	26	14		10	5000	8	328000	107	82	1	0.68	49	22	991	93	337	2	2
116	37	1	1	0	0	0	0	0	0	1	0	9	3	2	1	0		0	0	0	0	0	0	0	0	0	0	0	35	50	10	24	14		29	5600	14	231000	64	74	1	0.86	695	57	1094	94	409	1	2
88	49	1	1	1	0	1	0	0	0	3	0	18	3	3	1	0	1	0	0	0	0	0	0	0	1	0	0	0	40	90	10	28	14	0.03	3.27	9670	12	470000	21	59	1.46	0.87	38	22.6	452	92	280	1	3
33	61	1	0	0	0	0	0	0	0	0	0	20	5	3	1	0	1	1	1	0	0	0	0	0	1	0	0	0	60	60	14	28	12	0.1	1.81	10200	5	525000	135	210	0.77	1.11		16.3	700	94	282	3	1
86	70	0	1	1	0	0	1	0	0	3	0	21	10	5	1	0	1	0	0	0	0	0	0	0	0	0	0	0	50	50	10	25	15	0.13	12.52	18660	4	347000	170	217	0.5	0.71	30	15	854	94	323	3	3
38	59	1	0	1	0	0	0	0	0	1	0	55	42	41	1	1	1	1	0	0	1	1	0	0	1	0	0	0	65	30	12	12	32	0.69	6.98	11950	4	299000	143	320	0.56	1.16	759	92	805	89	276	2	2
85	53	1	1	1	0	0	0	0	0	2	0	32	19	14	1	0	1	0	0	0	1	1	0	0	1	0	0	0	50	60	14	32	16	0.13	35	9770	5	356000	89	77	0.27	0.79	66	25	627	95	330	2	3
20	65	1	0	0	0	0	0	0	0	0	0	21	13	11	1	1	1	0	1	0	1	0	1	0	1	1	0	0	50	60	13	31	15	0.03	1.56	11820	5	535000	281	387	0.79	0.74	38	21.2	841	91	238	3	1
21	71	1	0	0	0	1	0	0	0	1	0	43	9	14	1	1	1	0	0	0	1	1	0	0	1	1	0	0	70	100	10	26	17	0.002	4.68	6860	10	283000	95	142	1.02	0.63	59	14	639	90	301	3	2
53	68	1	0	1	0	0	0	0	0	1	1	29	27	27	1	1	1	0	0	0	1	0	1	0	1	1	0	0	80	40	14	34	14	0.31	21.9	16430	3.5	269000	72	85	0.83	0.98	606	43	736	89	262	3	2
23	67	1	0	1	0	1	0	0	0	2	0	21	12	11	1	0	1	0	1	0	0	0	0	0	0	0	0	0	60	50	12	30	15	0.03	7.29	5340	11	271000	14	26	0.37	0.83	54	13	990	84	171	3	3
79	70	1	1	0	0	0	0	0	0	1	1	67	65	66	1	0	1	0	0	0	0	0	0	0	1	1	1	1	70	50	15	31	15	0.18	14.2	13530	3	291000	32	48	1	1.06	96	10.9	756	85	249	3	2
3	45	1	1	0	0	0	1	0	0	2	0	30	20	14	1	0	1	0	0	0	0	0	0	0	1	0	0	0	50	60	12	27	13	0.05	5.36	10560	5	336000	60	185	2.01	0.59	39	26.5	446	95	330	1	3
22	56	1	0	0	0	0	0	0	0	0	0	21	13	11	1	1	1	0	0	0	0	0	0	0	1	0	0	0	40	40	14	32	15	0.17	5.22	14900	3.6	268000	45	62	0.92	0.94	33	19.6	632	93	285	2	1
162	57	1	0	0	0	0	0	0	0	0	0	38	9	10	1	0	1	1	0	0	0	0	0	0	1	0	0	0	70	28	12	24	14	0.04	11	11490	5.5	378000	18	63	1	0.82	122	39	833	95	239	2	1
5	47	1	1	0	0	1	0	0	0	2	0	36	33	21	1	1	1	0	0	0	0	0	0	0	1	1	0	0	60	60	12	33	18	0.051	6.42	9900	9	337000	23	42	0.16	0.56	18	13.5	684	89	334	1	3
105	55	1	0	0	0	0	0	0	0	0	0	12	3	5	1	0	1	0	0	0	0	0	0	0	1	0	0	0	50	50	10	23	12	0.01	8.48	13070	11	514000	30	39	0.5	0.76	110	27.8	474	90	158	2	1
78	69	1	0	1	0	0	0	0	0	2	0	22	6	4	1	1	1	0	0	0	0	0	0	0	1	1	0	0	50	50	12	29	16	0.29	17.35	7480	6	368000	64	167	0.5	1.1	66	42.2	634	87	89.4	3	3
99	69	1	1	1	0	1	0	0	0	3	0	21	4	9	1	0	1	0	0	0	0	0	0	0	1	0	0	0	80	65	10	26	16	0.07	0.72	6530	11	332000	27	42	1.03	0.64	147	20	378	89	200	3	3
98	44	1	0	0	0	0	0	0	0	0	0	40	30	31	1	1	1	0	0	0	0	0	0	0	1	1	0	0	80	60	12	28	16	0.1	18.6	4660	14	197000	54	39	0.5	0.92	118	26.6	847	83	197	1	1
80	56	1	1	0	0	0	0	0	0	1	0	17	9	7	1	0	1	0	0	0	1	0	1	0	1	0	0	0	60	70	12	26	14	0.24	21.6	9730	9	254000	28	113	0.89	0.76	0	45.7	514	76	128	2	2
35	77	1	1	1	0	1	0	0	0	3	1	19	14	18	1	1	1	1	0	0	1	1	0	0	1	1	1	0	65	80	14	28	12	0.3	10.78	14670	3.5	196000	25	37	0.45	0.95	232	156	742	65	100	3	3
112	58	1	1	0	0	0	0	0	0	1	0	65	60	59	1	0	1	0	0	0	1	0	1	0	1	1	0	0	60	100	10	25	15		28	13000	12	400000	30	17	1	0.5	529	15	993	88	326	2	2
41	59	1	1	0	0	1	0	0	0	2	0	34	23	21	1	1	1	0	0	0	1	1	0	0	1	0	0	0	70	50	14	25	15	0.61	9.96	5580	11.5	163000	25	21	0.35	1.9	181	72	1286	85	386	2	3
183	46	1	0	0	0	0	0	0	0	0	0	15	12	4	1	0	1	1	0	0	0	0	0	0	1	0	0	0	50	44	15	28	12	0.17	17.53	4220	10.7	264000	335	601	0.86	0.62	165	24	2745	90	253	1	1
55	45	1	1	0	0	1	0	0	1	3	1	13	12	13	1	1	1	1	1	0	1	1	0	0	1	1	0	0	80	60	14	34	20	0.68	15.4	3230	13.3	167000	74	31	0.67	1.33	300	84.1	1816	65	185	1	3
44	41	1	0	0	0	0	0	0	0	0	0	12	8	5	1	0	1	0	0	0	0	0	0	0	1	0	0	0	60	40	14	30	15	0.05	17.28	12070	14	369000	40	49	0.8	1.26	19	130	660	85	247	1	1
158	70	1	0	1	1	1	0	0	0	3	0	24	10	8	1	0	1	1	0	0	0	0	0	0	1	0	1	0	70	50	12	24	12	24.41	14.1	12640	7	424000	26	28		1.04	80	20	818	88.4	142	3	3
133	55	1	1	0	0	0	0	0	0	1	0	11	3	4	1	0	1	0	0	0	0	0	0	0	0	0	0	0	70	50	12	21	14		2.3	5300	8	293000	182	313	0.7	0.88	88	45	449	86	240	2	2
141	66	1	1	0	0	0	0	0	0	1	0	20	9	9	1	0	1	0	0	0	0	0	0	0	1	0	0	0	60	80	12	30	18		19	9000	7	235000	39	46	0.39	0.57	92	20	999	68	94	3	2
81	66	1	1	1	0	0	0	0	0	2	1	29	26	26	1	0	1	0	0	0	1	0	1	0	1	1	0	1	70	45	14	31	15	0.26	12.6	10200	4	215000	42	34	0.8	0.87	0	33.2	539	90	297	3	3
82	45	1	1	0	0	0	0	0	0	1	0	19	9	6	1	0	1	0	1	0	1	1	0	0	1	0	1	0	80	35	13	30	16	0.18	3.74	8960	16	411000	45	56	0.9	1.68	387	28.5	964	82	79.3	1	2
50	55	1	1	0	0	0	0	0	0	1	0	12	4	4	1	0	1	0	0	0	1	1	0	0	1	0	0	0	75	70	13	33	11.5	0.02	25.65	8850	20.5	266000	25	39	0.43	1.05	339	19.9	861	80	214	2	2
16	33	1	1	0	0	0	0	0	1	2	0	14	9	7	1	0	1	0	1	0	0	0	0	0	1	0	0	0	50	100	10	30	16	0.02	28.2	6950	13	337000	96	135	0.89	0.83	30	15	759	89	313	1	3
15	53	1	1	0	0	0	0	0	0	1	0	17	10	7	1	0	1	0	0	0	0	0	0	0	1	0	0	0	60	15	14	33	12	0.02	2.25	9990	6	353000	10	27	0.64	0.85	45	21	439	90	274	2	2
64	54	1	1	0	0	0	0	0	0	1	0	12	7	6	1	0	1	1	0	0	0	0	0	0	0	0	0	0	70	70	13	32	13	0.08	14.69	10800	7	310000	44	132	0.7	0.93	40	31.5	738	80	258	2	2
165	41	1	1	0	0	0	0	0	0	1	0	23	12	13	1	0	1	0	0	0	0	0	0	0	1	0	0	0	50	75	16	28	16	0.75	14.2	14980	4	182000	69	190	0.62	0.62		13.2	658	90	125	1	2
195	64	0	0	1	0	0	0	0	0	1	0	28	11	8	1	0	1	0	0	0	0	0	0	0	0	0	0	0	50	60	12	28	16		14.94	11840	4	263000	23	30		0.61		17.3	762	94	107	3	2
14	81	1	0	0	0	0	1	0	0	1	1	21	17	17	1	1	1	0	0	1	1	1	0	0	1	1	1	1	50	59	14	19	15	0.03	17.28	7930	9	210000	51	36	0.38	0.74	85	19.6	575	89	279	3	2
26	71	0	0	1	0	0	0	0	0	1	0	22	14	10	1	1	1	0	0	0	0	0	0	0	0	0	0	0	50	30	12	34	10	0.12	7.13	18620	6	328000	27	44	0.22	0.91	73	34	529	91	308	3	2
193	43	1	0	0	0	0	0	0	0	0	0	30	10	11	1	0	1	0	0	0	0	0	0	0	1	0	0	0	40	60	12	30	15		17.44	8230	3	232000	43	116		0.87	186		700	83	263	1	1
160	56	1	1	0	0	0	0	0	0	1	1	36	36	36	1	0	1	0	0	0	1	1	0	0	1	0	0	1	70	35	12	26	15		5.83	9990	7	146000	48	44	1.33	1.1	309		1042	92.9	84.2	2	2
161	44	1	0	0	0	0	0	0	0	0	0	24	9	9	1	0	1	0	0	0	0	0	0	0	1	0	0	0	90	50	12	26	14		14.29	9040	5.4	193000	256	303	1.8	0.96	578	33.7	947	94	298	1	1
189	55	0	1	0	0	0	0	0	0	1	1	10	5	5	1	0	1	0	0	0	0	0	0	0	1	0	0	0	60	40	12	29	15		4.38	5580	22	298000	107	82		0.5	49	22	991	92	337	2	2
196	49	0	0	1	0	1	0	0	0	0	0	14	6	8	1	0	1	0	0	0	0	0	0	0	1	0	0	0	50	40	14	28	14			6560	3	333000	27	25		0.66	25	18.6	702	93	254	1	1
29	51	1	1	0	0	0	0	0	0	1	0	19	13	9	1	0	1	1	1	0	0	0	0	0	0	0	0	0	40	100	14	44	27	0.11	4.77	10980	7	402000	60	121	0.27	0.8	128	19	809	85	159	2	2
151	42	1	0	0	0	0	1	0	0	1	0	113	14	10	0	0	1	0	0	0	0	0	0	0	1	0	0	0	40	50	10	26	15		12.6	11040	13	424000	96	169	0.6	1.01	658	33.5	776	86	161	1	2
171	29	0	0	0	0	0	0	0	0	0	0	17	7	8	1	0	1	0	0	0	0	0	0	0	1	0	0	0	40	55	8	24	15	0.07	7.65	3620	32	262000	125	143	0.7	0.49	160	3.7	1590	92	309	1	1
66	77	1	0	0	0	0	1	0	1	2	1	36	31	35	1	1	1	1	1	0	1	1	0	0	1	1	0	0	80	50	12	32	20	0.2	5.44	10610	3.7	303000	75	111	1.09	0.85	139	30.7	1599	80	260	3	3
97	53	0	1	0	0	0	0	0	1	2	0	23	3	11	1	0	1	0	0	0	0	0	0	0	1	0	0	0	80	50	12	27	15	0.06	1.04	14500	4	280000	41	99	0.34	0.69	90	17.7	609	88	167	2	3
45	48	0	1	0	0	0	0	0	0	1	0	28	17	11	1	0	1	0	0	0	0	0	0	0	1	1	0	0	60	45	14	29	15	0.07	19.52	15030	13	478000	76	74	0.57	0.9	51	25.5	1119	75	189	1	2
200	43	0	1	0	0	0	0	0	0	1	0	19	11	6	1	0	1	0	0	0	0	0	0	0	0	0	0	0	70	90	10	32	22		17.69	6360	6	346000	228	190		0.73		74.8	1810	94	309	1	2
179	75	1	0	0	0	0	1	0	0	1	1	51	47	42	1	0	1	0	0	0	1	1	0	0	1	1	0	0	70	35	12	24	12	0.1	1.7	5750	7	209000	68	64	1.97	0.64	500	65.3	887	91	486	3	2
70	49	1	0	0	0	0	0	0	0	0	0	14	5	4	1	0	1	0	0	0	0	0	0	0	1	0	0	0	40	35	12	28	17	0.05	2.08	14030	6	505000	34	59	0.74	0.67	36	9.9	524	66	220	1	1
69	65	1	1	0	0	0	0	0	0	1	0	24	9	7	1	1	1	1	0	0	0	0	0	0	0	1	0	0	70	70	14	35	16	0.11	8.14	15440	2	500000	31	63	0.89	0.8	89	19.9	681	87	246	3	2
83	64	1	0	0	0	0	0	0	0	0	0	25	3	3	1	0	1	0	0	0	0	0	0	0	0	0	0	0	60	50	10	22	10	0.22	18.1	10507	9	290000	41	57	0.52	1.28	85	32	608	92	396	3	1
93	55	1	1	0	0	0	0	0	0	1	0	33	11	10	0	0	1	0	0	0	0	0	0	0	1	0	0	0	70	30	12	26	14	0.1	4.72	8230	9	278000	55	85	0.76	0.61	680	41.4	801	92	281	2	2
199	46	1	0	0	0	0	0	0	0	0	1	13	12	11	1	1	1	0	0	0	1	1	0	0	1	1	0	0	30	100	13	31	18		7.21	7100	11	261000	84	71		0.63			848	94	322	1	1
178	52	0	1	0	0	1	0	0	0	2	0	35	7	12	1	0	1	0	0	0	0	0	0	0	0	0	0	0	50	35	12	30	18	0.35	2.3	6240	13.3	236000	54	42	0.5	0.48	165	21	840	95	354	2	3
166	44	0	1	0	0	0	0	0	0	1	0	13	5	7	1	0	0	0	0	0	0	0	0	0	1	0	0	0	70	55	11	26	16	0.06	11	8000	4	210000	90	152	0.98	0.61		13.6	371	90	76.8	1	2
134	55	1	1	0	0	0	0	0	0	1	0	21	8	8	1		1	0	0	0	0	0	0	0	1	0	0	0	50	80	12	30	18	2	20	6000	8	317000	204	179	1	1.2	583	47	940	90	310	2	2
191	34	1	0	0	0	0	0	0	0	0	0	10	6	5	1	0	1	0	0	0	0	0	0	0	1	0	0	0	60	40	12	27	15			6510	12	211000	100	133		0.92	271	26	700	90	102	1	1
168	37	1	0	0	0	0	0	0	0	0	0	20	11	9	1	0	1	1	0	0	0	0	0	0	1	1	0	0	60	35	13	26	14	0.29	3.96	6870	8	176000	42	84	0.52	0.93	138	24.2	388	88	299	1	1
65	64	1	0	1	0	0	0	0	0	1	0	78	21	50	1	1	1	1	0	1	1	1	0	0	0	1	1	0	80	50	13	25	14	0.15	13	22830	2	286000	36	30	0.75	2.11	163	40	656	77	51	3	2
6	48	1	1	1	0	1	1	0	0	4	1	14	10	10	1	0	1	0	0	0	1	1	0	0	1	0	0	0	65	60	12	34	17	0.126	3.72	6620	3.5	525000	47	43	0.98	0.97	126	30	499	88	170	1	3
84	64	1	1	1	1	0	1	0	0	4	1	32	27	27	1	0	1	0	1	0	0	0	0	0	1	1	1	1	70	60	14	33	18	0.06	15.93	8340	9	203000	84	75	0.6	0.84	233	22	820	93	340	3	3
61	62	1	1	1	0	1	0	0	0	3	0	24	12	9	1	1	1	0	0	0	0	0	0	0	0	0	0	0	60	100	14	36	17	1.82	8.67	20210	6	240000	79	84	0.98	0.84	138	27	915	84	237	3	3
127	63	1	1	0	0	0	0	0	0	1	0	8	5	4	1	1	1	0	0	0	0	0	0	0	0	0	0	0	50	75	10	26	16		18	10000	4	154000	65	115	1.32	0.75	182	23	658	90	333	3	2
19	59	1	1	0	0	1	0	1	0	3	1	10	6	10	1	0	1	0	1	0	1	1	0	0	1	0	1	1	60	100	12	33	11	0.15	10.13	17970	6	234000	44	64	0.23	1.07	748	59	986	85	70	2	3
113	47	1	0	0	0	0	0	0	0	0	0	25	13	12	1	0	1	1	0	0	0	0	0	0	1	0	0	0	50	100	12	28	16		6	8000	6	340000	74	220	1	0.79	213	33	1800	87	285	1	1
76	64	1	0	0	1	0	1	0	0	2	1	37	36	36	1	1	1	1	0	1	0	0	0	0	1	0	1	0	80	70	14	30	15	0.4	14	10220	9	221000	114	114	0.34	0.6	63	29	886	84	93	3	3
10	72	1	1	1	0	1	0	1	0	4	1	9	9	9	1	1	1	0	0	1	1	1	0	0	1	1	1	0	70	40	10	31	15	1.79	21	4150	13	120000	118	58	0.51	7.57	176	62	1272	89	164	3	3
36	68	1	0	1	0	0	0	0	0	1	0	47	14	12	1	1	1	1	0	0	1	1	0	0	1	1	0	0	60	70	14	38	10	0.48	4.71	17580	3	542000	42	30	0.32	1.5	50	20	743	92	281	3	2
109	69	0	1	1	0	0	1	0	0	3	0	88	71	61	1	0	1	0	0	0	0	0	0	0	1	1	0	1	90	80	14	34	20		6.37	4480	5	133000	321	126	0.33	0.55	107	55.6	1670	88	116	3	3
139	58	0	1	0	0	0	0	0	0	1	1	17	6	13	1	1	1	0	0	0	1	1	0	0	0	0	0	0	40	80	8	28	20		11	12000	7	363000	21	75	1	0.6	47	25	646	89	294	2	2
107	66	1	1	1	1	0	0	1	0	4	0	48	32	30	1	0	1	1	0	0	0	0	0	0	1	1	0	1	80	60	12	27	15	0.06	14.4	8800	7	272000	34	21	0.46	0.84	896	44.6	1815	92	329	3	3
90	52	0	1	0	0	0	0	0	0	1	1	18	18	18	1	0	1	0	1	0	1	1	0	0	1	1	0	0	90	80	16	38	22	0.21	16	11760	9	189000	71	59	1.3	0.77	919	32	1240	80	56	2	2
135	63	0	1	0	0	0	0	0	0	1	0	16	10	9	1	1	1	0	0	0	0	0	0	0	1	0	0	0	60	60	10	28	18	3.8	26	13000	4	289000	136	131	1	1.02	38	0.68	770	86	256	3	2
48	59	1	0	0	0	0	0	0	1	1	1	28	41	42	1	1	1	1	1	0	1	1	0	0	1	1	0	0	90	90	14	38	25	0.22	52.4	12740	10	157000	169	63	1.08	1.04	67	18.6	754	60	55.9	2	2
60	53	1	1	0	0	0	0	0	1	2	1	28	18	21	1	1	1	1	1	0	1	0	1	0	1	1	1	0	80	60	12	28	20	0.03	11.21	19330	8	262000	57	136	0.53	0.89	165	23	509	92	294	2	3
77	73	1	0	0	0	0	0	0	0	0	0	19	11	9	1	0	1	0	0	0	1	1	0	0	1	0	0	0	60	50	13	31	18	0.37	25	8590	4	179000	261	150	0.9	0.89	462	17.5	514	85	86.5	3	1
136	47	1	1	0	0	1	0	0	0	2	1	21	19	21	1	1	1	0	0	0	1	1	0	0	1	1	0	0	70	80	12	27	15	0.23	15	11000	15	127000	77	67	0.5	1.09	100	28	659	84	154	1	3
182	46	0	1	1	0	0	0	0	0	2	0	18	13	12	1	0	1	0	0	0	0	0	0	0	1	0	0	0	60	65	20	26	20	0.13	17.31	5380	11	264000	22	13	0.92	0.84	260	27.2	1200	93	298	1	3
39	34	1	1	0	0	0	1	0	1	3	0	16	5	5	1	0	1	1	1	0	0	0	0	0	1	0	0	0	70	50	14	34	15	0.02	0.59	6420	8	357000	55	156	0.29	0.79	55	55	949	89	307	1	3
25	70	1	0	0	0	0	1	0	0	1	0	51	32	45	1	1	1	1	0	0	1	1	0	0	1	1	0	0	75	100	12	30	14	1.01	1.45	26570	4	175000	48	57	0.38	1.07	156	26.7	504	89	238	3	2
27	48	1	1	0	0	1	1	0	0	3	1	18	12	16	1	1	1	1	0	1	1	0	0	1	1	1	1	0	75	90	12	23	8	0.81	15.11	20990	9	325000	44	21	0.58	0.89	27	20.8	472	69	218	1	3
145	52	1	0	0	0	0	0	0	0	0	0	11	5	4	1	0	1	0	0	0	0	0	0	0	0	0	0	0	40	60	12	27	18		17	10000	8	362000	6	24	0.8	0.59	60	20	872	89	287	2	1
190	53	1	0	0	0	0	0	0	0	0	1	17	16	13	1	1	1	0	0	0	1	1	0	0	1	1	0	0	70	55	14	32	18			14390	3	199000	16	19		0.85	337	21.6	525	92	128	2	1
150	63	1	1	1	1	0	0	1	0	4	1	9	7	7	1	1	1	0	0	0	1	1	0	0	1	1	0	1	60	100	14	28	14		32	19000	15	204000	57	23	0.63	1.68	1015	52	1470	87	260	3	3
71	71	1	0	1	0	0	0	1	1	3	1	15	6	6	1	0	1	0	0	1	1	1	0	0	1	0	1	0	80	80	10	40	20	0.49	9.92	38880	3	190000	22	31	0.42	7.35	531	95.1	1380	77	235	3	3
117	55	1	0	0	0	0	1	0	0	1	0	44	21	23	1	0	1	0	0	0	1	0	1	0	1	0	1	0	50	100	10	24	14		25	7000	7	319000	95	86	1	2	148	24	1245	89	312	2	2
31	58	1	0	0	1	1	1	0	1	4	1	22	10	11	1	1	1	1	0	0	0	0	0	0	1	1	1	0	70	100	10	25	15	0.13	5.68	4030	6	305000	27	24	0.51	0.87	142	25	485	80	141	2	3
72	64	1	1	1	0	0	0	0	0	2	0	43	13	40	1	0	1	1	1	0	1	0	0	1	1	1	0	0	90	80	13	30	17	0.3	10.4	6190	9	283000	50	49	0.42	1.1	187	29	735	80	188	3	3
175	63	0	1	0	0	0	0	0	0	1	0	29	12	15	1	0	1	1	0	0	0	0	0	0	1	0	0	0	50	80	10	28	17	0.05	2.59	9710	10	288000	67	76	0.85	0.57	135	93.5	911	90	138	3	2
129	73	1	0	1	0	0	0	0	0	1	1	17	12	15	1	1	1	0	0	0	1	1	0	0	0	1	1	0	60	90	12	30	18		11	12000	3	272000	34	44	1	0.8	305	60	941	80	75	3	2
2	42	1	1	0	0	0	0	0	0	1	1	27	21	23	1	0	1	0	1	0	1	1	0	0	1	0	1	0	89	70	14	35	15	0.75	14.23	6330	15	244000	114	79	0.63	0.88	1600	67	1325	89	292	1	2
40	57	1	0	0	0	0	0	0	0	0	0	18	8	7	1	0	1	0	0	0	0	0	0	0	1	0	0	0	90	40	13	29	16	3.08	9.15	9940	6.3	235000	81	96	0.26	1.89	79	14.7	706	78	76.4	2	1
119	60	1	1	1	0	0	0	0	0	2	0	23	10	9	1	0	1	1	0	0	0	0	0	0	1	0	0	0	70	100	14	34	20		22	10000	11	750000	44	81	1	0.75	52	10	544	88	127	3	3
62	65	1	1	1	0	1	0	0	0	3	0	33	16	19	1	1	1	0	0	0	0	0	0	0	1	0	0	0	80	100	12	34	20	2.39	20.6	8390	11	341000	34	74	0.68	0.84	63	17.5	547	77	76	3	3
56	56	1	1	0	0	1	0	0	1	3	0	23	8	11	1	0	1	1	1	0	0	0	0	0	0	0	0	0	70	90	10	28	15	0.35	10.58	5040	4.8	358000	25	47	0.3	0.73	36	8	552	89	136	2	3
187	60	1	1	0	0	0	0	0	0	1	0	43	25	24	1	0	1	0	0	0	0	0	0	0	1	0	0	0	70	60	14	32	14		15	9720	17	181000	88	108	1.04	0.88			1320	91	279	3	2
9	66	0	0	1	1	1	0	1	0	4	1	26	27	27	1	1	1	0	0	1	1	0	1	0	1	1	0	0	75	90	14	35	15	1.11	10.5	16690	2	455000	23	20	0.51	3.74	49	25	525	85	60	3	3
52	62	0	1	1	0	1	0	0	0	3	1	16	11	15	1	1	1	1	0	1	1	1	0	0	1	1	0	0	80	70	14	30	15	0.73	17.25	10380	3	302000	39	45	0.8	1.07	208	32.5	1365	66	177	3	3
188	51	0	0	0	0	0	0	0	0	0	0	20	10	8	1	0	1	1	0	0	0	0	0	0	1	0	0	0	70	40	12	30	20			7770	11	251000	25	54		0.76		18.4	1231	86	174	2	1
37	54	1	1	1	0	0	1	0	0	3	1	18	14	14	1	1	1	1	0	0	0	0	0	0	1	1	1	0	70	80	14	35	15	0.05	14	10700	6	215000	53	72	0.43	0.8	161	24.4	990	84	86	2	3
157	36	1	1	0	0	0	0	0	0	1	0	24	9	11	1	0	1	0	0	0	0	0	0	0	1	0	0	0	70	35	10	26	16		18.52	6570	9	532000	50	146	0.56	0.93	444	27.4	616	93	220	1	2
30	59	1	1	0	0	1	0	0	0	2	1	32	27	28	1	1	1	1	0	1	1	1	0	0	1	1	1	0	80	100	14	28	13	1.62	20.26	1160	3	309000	17	40	0.2	2.4	111	20	1075	78	143	2	3
42	45	1	1	0	0	0	0	0	0	1	1	9	7	9	1	1	1	0	0	0	1	1	0	0	1	1	0	1	70	80	12	37	23	0.02	16.4	24640	10	463000	83	122	0.89	1.22	151	20	1286	40	61	1	2
124	58	1	1	0	0	0	0	0	0	1	0	57	22	21	1	1	1	0	0	0	0	0	0	0	1	1	0	0	60	100	15	35	20		16	22000	1	483000	58	110	0.37	0.98	181	29	997	86	151	2	2
51	57	0	1	0	0	0	0	0	0	1	0	14	3	3	1	0	1	0	0	0	0	0	0	0	0	0	0	0	60	35	12	28	12	0.02	51.89	10410	7	290000	27	28	0.4	1.01	33	32	510	80	230	2	2
47	63	1	0	0	0	0	0	0	1	1	1	21	13	14	1	1	1	1	1	1	1	1	0	0	1	1	1	0	75	70	14	29	15	0.14	16.13	16170	2.8	341000	20	24	0.83	1.12	225	57.3	1393	85	260	3	2
144	40	1	0	0	0	0	0	0	0	0	0	23	10	10	1	0	1	0	0	0	0	0	0	0	1	0	0	0	50	40	12	30	18		8.7	10000	9	304000	100	140	0.2	0.7	107	39	743	88	211	1	1
59	60	1	1	0	0	0	0	0	0	1	1	14	12	13	1	1	1	1	0	0	1	1	0	0	1	1	0	0	85	90	16	42	22	0.21	21.75	17200	7	223000	67	42	0.47	1.29	194	54	1734	70	158	3	2
49	55	1	0	0	0	0	0	0	1	1	1	22	16	17	1	1	1	0	1	0	1	0	1	0	1	1	0	0	75	50	12	30	18	0.5	14.85	3540	8	206000	28	35	0.68	0.94	225	14	1089	69	132	2	2
1	76	0	1	1	0	0	1	0	0	3	1	31	24	27	1	0	0	1	0	0	1	1	0	0	1	0	0	0	90	90	12	26	14	0.06	8.77	12410	4	146000	11	13	0.23	1.18	115	22.1	830	85	231	3	3
12	70	1	0	1	1	1	0	1	0	4	1	11	10	11	1	1	1	0	0	1	1	1	0	0	1	1	1	0	70	100	7	22	13	0.4	14.18	12880	3	342000	105	105	2.3	9.44	11	34	982	65	55	3	3
8	76	0	1	1	0	0	0	0	1	3	1	6	7	7	1	1	1	0	0	1	0	0	0	0	1	1	1	0	80	100	15	39	12	1.86	31.2	29780	4	154000	54	57	0.7	1.35	500	35	1056	60	60	3	3
68	58	1	1	0	0	0	1	0	1	3	1	6	2	2	1	1	1	1	1	0	0	0	0	0	0	0	0	0	70	100	13	42	14	0.22	12.37	7410	18	241000	71	106	1.3	1.14	168	29.4	1489	86	245	2	3
67	43	1	0	1	1	0	1	1	1	5	1	6	1	3	1	1	1	0	0	1	0	0	0	0	1	1	1	0	95	65	12	28	16	7.1	19.8	3020	9	119000	96	25	0.39	7.33	111	95	1624	89	300	1	3
[truncated: 18 more columns]
